# Supplementary material
Source: Springer Nature journal article supplement (https://www.springermedizin.de/resource/supplementary/12943_2010_884_MOESM7_ESM.pdf/9551950)

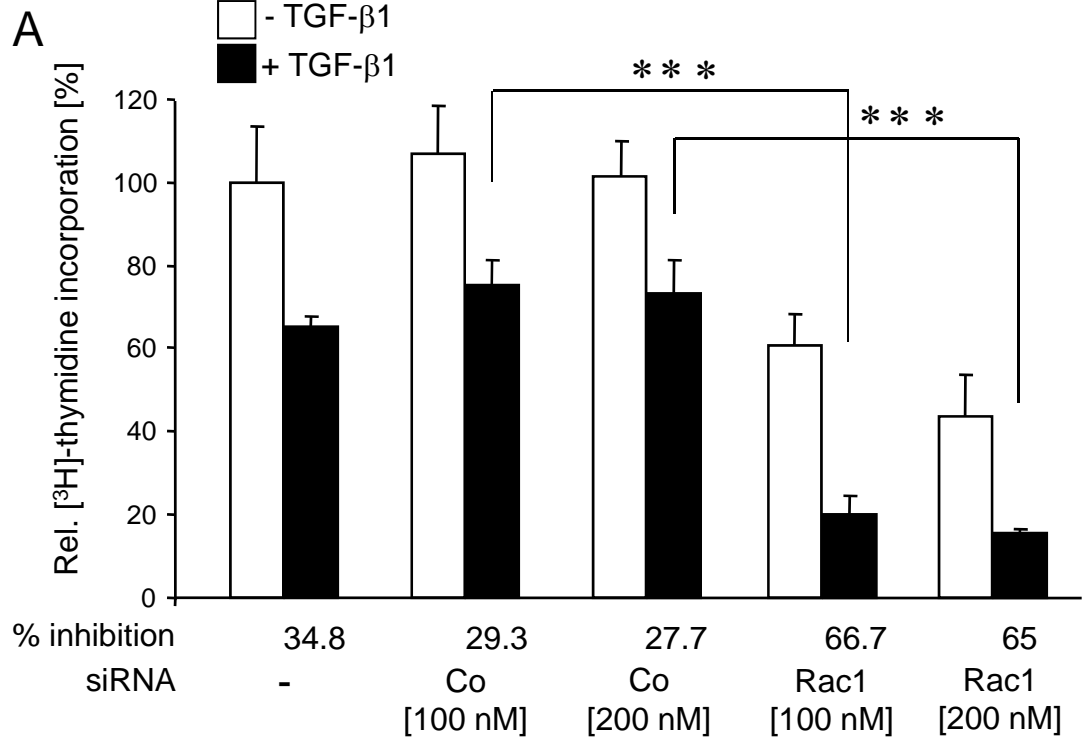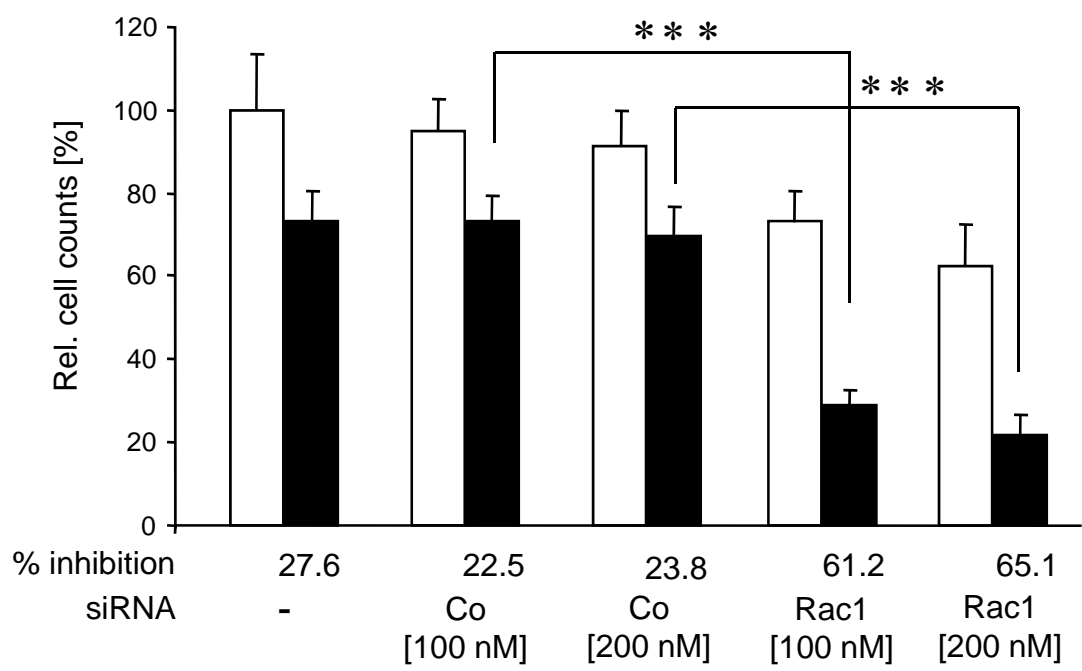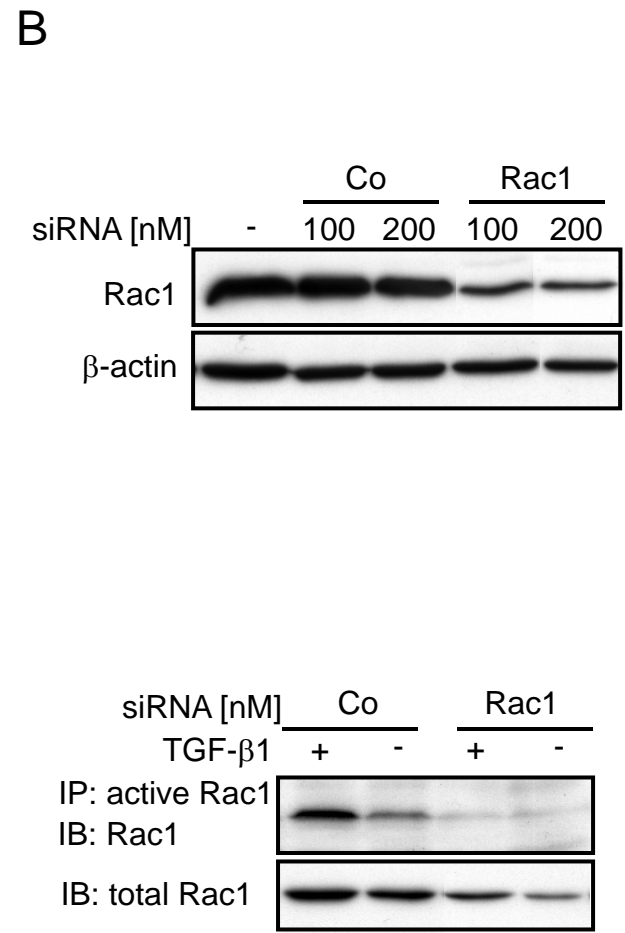

Supplement: MOESM7 [file 9551950]
